# Supplementary material for: Long-Term Outcomes of Stereotactic Radiosurgery for Trigeminal, Facial, and Jugular Foramen Schwannoma in Comparison with Vestibular Schwannoma
Source: MDPI journal article supplement (doi:10.3390/cancers13051140), 2021-03-07
Supplement: s1 [file s1]

**Table S1.** Baseline characteristics and dosimetry data of the TS-matched cohort.

| Variables                      | VS           | TS          | <i>p</i> -value |
|--------------------------------|--------------|-------------|-----------------|
| Patients (tumors), n           | 19           | 19          |                 |
| Age at SRS, years              | 50.5 ± 14.7  | 50.1 ± 15.4 | 0.930           |
| Observation period, months     | 102.8 ± 87.3 | 91.5 ± 82.4 | 0.737           |
| Target volume, cm <sup>3</sup> | 4.0 ± 2.5    | 3.9 ± 2.4   | 0.930           |
| Prescription dose, Gy          | 13.7 ± 2.4   | 14.1 ± 1.5  | 0.141           |
| Central dose, Gy               | 28.3 ± 4.6   | 29.4 ± 5.0  | 0.403           |
| Male                           | 8 (42.1)     | 8 (42.1)    | 1.000           |
| Surgical history               | 3 (15.7)     | 3 (15.7)    | 1.000           |

Data are reported as mean ± standard deviation or n (%) unless otherwise stated. VS, vestibular schwannoma; TS, trigeminal schwannoma; SRS, stereotactic radiosurgery.

**Table S2.** Baseline characteristics and dosimetry data of the FS-matched cohort.

| Variables                      | VS          | FS          | <i>p</i> -value |
|--------------------------------|-------------|-------------|-----------------|
| Patients (tumors), n           | 7           | 7           |                 |
| Age at SRS, years              | 60.6 ± 4.9  | 61.6 ± 12.7 | 0.949           |
| Observation period, months     | 72.5 ± 58.2 | 85.5 ± 49.9 | 0.848           |
| Target volume, cm <sup>3</sup> | 1.7 ± 1.9   | 1.7 ± 1.9   | 0.898           |
| Prescription dose, Gy          | 12.6 ± 1.0  | 12.9 ± 2.3  | 0.656           |
| Central dose, Gy               | 26.0 ± 2.6  | 25.3 ± 6.1  | 0.494           |
| Male                           | 2 (28.6)    | 2 (28.6)    | 1.000           |
| Surgical history               | 3 (42.9)    | 3 (42.9)    | 1.000           |

Data are reported as mean ± standard deviation or n (%) unless otherwise stated. VS, vestibular schwannoma; FS, facial schwannoma; SRS, stereotactic radiosurgery.

**Table S3.** Baseline characteristics and dosimetry data of the JFS-matched cohort.

| Variables                      | VS          | JFS         | <i>p</i> -value |
|--------------------------------|-------------|-------------|-----------------|
| Patients (tumors), n           | 18          | 18          |                 |
| Age at SRS, years              | 48.3 ± 16.4 | 47.9 ± 18.6 | 0.825           |
| Observation period, months     | 79.5 ± 96.4 | 43.9 ± 37.0 | 0.311           |
| Target volume, cm <sup>3</sup> | 4.3 ± 5.3   | 4.1 ± 3.7   | 0.849           |
| Prescription dose, Gy          | 13.2 ± 2.3  | 13.6 ± 1.0  | 0.038*          |
| Central dose, Gy               | 27.1 ± 4.9  | 28.9 ± 3.3  | 0.098           |
| Male                           | 8 (44.4)    | 8 (44.4)    | 1.000           |
| Surgical history               | 11 (61.1)   | 11 (61.1)   | 1.000           |

\*  $p < 0.05$  is considered statistically significant. Data are reported as mean ± standard deviation or n (%) unless otherwise stated. VS, vestibular schwannoma; JFS, jugular foramen schwannoma; SRS, stereotactic radiosurgery.

**Table S4.** Summary of radiation-induced adverse events after SRS in TS matched cohort.

| Variables                 | VS      | TS      | <i>p</i> -value |
|---------------------------|---------|---------|-----------------|
| Number of cases with RAEs | 1 (5.3) | 1 (5.3) | 1.000           |
| Trigeminal neuralgia      | 0 (0.0) | 0 (0.0) | N/A             |
| Facial palsy              | 1 (5.3) | 0 (0.0) | 0.311           |
| Lower palsy               | 0 (0.0) | 0 (0.0) | N/A             |
| Hydrocephalus             | 1 (5.3) | 1 (5.3) | 1.000           |
| CTCAE grade 3–4           | 1 (5.3) | 1 (5.3) | 1.000           |

All events occurred in the same case. VS, vestibular schwannoma; TS, trigeminal schwannoma; RAEs; radiation-induced adverse events; CTCAE, Common Terminology Criteria for Adverse Events version 5.0; N/A, not applicable.

**Table S5.** Summary of radiation-induced adverse events after SRS in FS matched cohort.

| <b>Variables</b>          | <b>VS</b> | <b>FS</b> | <b><i>p</i>-value</b> |
|---------------------------|-----------|-----------|-----------------------|
| Number of cases with RAEs | 0 (0.0)   | 0 (0.0)   | N/A                   |
| Trigeminal neuralgia      | 0 (0.0)   | 0 (0.0)   | N/A                   |
| Facial palsy              | 0 (0.0)   | 0 (0.0)   | N/A                   |
| Lower palsy               | 0 (0.0)   | 0 (0.0)   | N/A                   |
| Hydrocephalus             | 0 (0.0)   | 0 (0.0)   | N/A                   |
| CTCAE grade 3–4           | 0 (0.0)   | 0 (0.0)   | N/A                   |

VS, vestibular schwannoma; FS, facial schwannoma; RAEs; radiation-induced adverse events; CTCAE, Common Terminology Criteria for Adverse Events version 5.0; N/A, not applicable.

**Table S6.** Summary of radiation-induced adverse events after SRS in JFS matched cohort.

| <b>Variables</b>          | <b>VS</b> | <b>JFS</b> | <b><i>p</i> value</b> |
|---------------------------|-----------|------------|-----------------------|
| Number of cases with RAEs | 2 (11.1)  | 1 (5.6)    | 0.547                 |
| Trigeminal neuralgia      | 0 (0.0)   | 0 (0.0)    | N/A                   |
| Facial palsy              | 1 (5.6)   | 0 (0.0)    | 0.311                 |
| Lower palsy               | 0 (0.0)   | 0 (0.0)    | N/A                   |
| Hydrocephalus             | 2 (11.1)  | 1 (5.6)    | 0.547                 |
| CTCAE grade 3–4           | 2 (11.1)  | 0 (0.0)    | 0.146                 |

VS, vestibular schwannoma; JFS, jugular foramen schwannoma; RAEs; radiation-induced adverse events; CTCAE, Common Terminology Criteria for Adverse Events version 5.0; N/A, not applicable.
